# Supplementary material for: Comprehensive analysis of neuronal guidance cue expression regulation during monocyte-to-macrophage differentiation reveals post-transcriptional regulation of semaphorin7A by the RNA-binding protein quaking
Source: PubMed Central journal article supplement (PMC7882812; doi:10.1177/1753425920966645), 2020-11-26
Supplement: sj-pdf-1-ini-10.1177_1753425920966645.pdf [file sj-pdf-1-ini-10.1177_1753425920966645.pdf]

## Supplementary Figure legends

**Supplementary Figure 1.** Assessing purity of monocyte isolation. A sample of peripheral blood mononuclear cells (top), of which the CD14-positive selected cells (middle) were isolated and the non-selected cells (bottom) were incubated with anti-human CD14 (APC, 1:200, Clone M $\phi$ P9, cat no. 345787, BD), measured by flow cytometry LSR-II (BD Biosciences, Vianen, The Netherlands), and analyzed using FlowJo Software version 10 (Tree Star, Ashland, OR, USA).

**Supplementary Figure 2.** Assessing multiple housekeeping genes. Quantitative PCR analysis of different housekeeping mRNA isolated from THP1-monocytes or -macrophages (A) or primary monocytes or macrophages (B). Gene expression is expressed Ct values. (A) each color is different housekeeping gene measured in 3 independent THP1 monocytes and 3 independent THP1 macrophages samples. (B) each color represents a different donor of primary monocytes or macrophages,  $n = 7$ .

**Supplementary Figure 3.** Visualization of the axon guidance pathway and the gene expression changes during human monocyte-to-macrophage differentiation. The gene expression in monocytes and macrophages was obtained from GEO database (Accession: GSE9820, Supplementary Table 1 Dataset 1). Data from 12 individuals were pooled for each cell type.

**Supplementary Figure 4** Visualization of the axon guidance pathway and the gene expression change during THP-1 cell to THP-1 macrophage differentiation. The changes in gene expression in THP-1 cells to THP-1 macrophages were profiled in on the “Affymetrix GeneChip Human HJAY Array” (Accession: GSE74887, Supplementary Table 1 Dataset 2). Data from 3 technical replicates were pooled for each cell type.

**Supplementary Figure 5.** Expression of NGCs in human monocyte/macrophage cell line. Heatmap of expression of NGCs in THP1 cells/THP1 macrophages in a log<sub>2</sub> scale. Light blue: higher expression; dark blue: lower expression;  $n = 3$ ; \*  $P < 0.05$ .

**Supplementary Figure 6.** Confirmation of regulation of NGC expression. Quantitative PCR analysis of NGCs mRNA isolated from THP1-monocytes or -macrophages. Gene expression is expressed as copies per GAPDH in a log<sub>2</sub> scale. Graphs show the mean  $\pm$  S.E.M.  $n = 3$  \*  $P < 0.05$ .

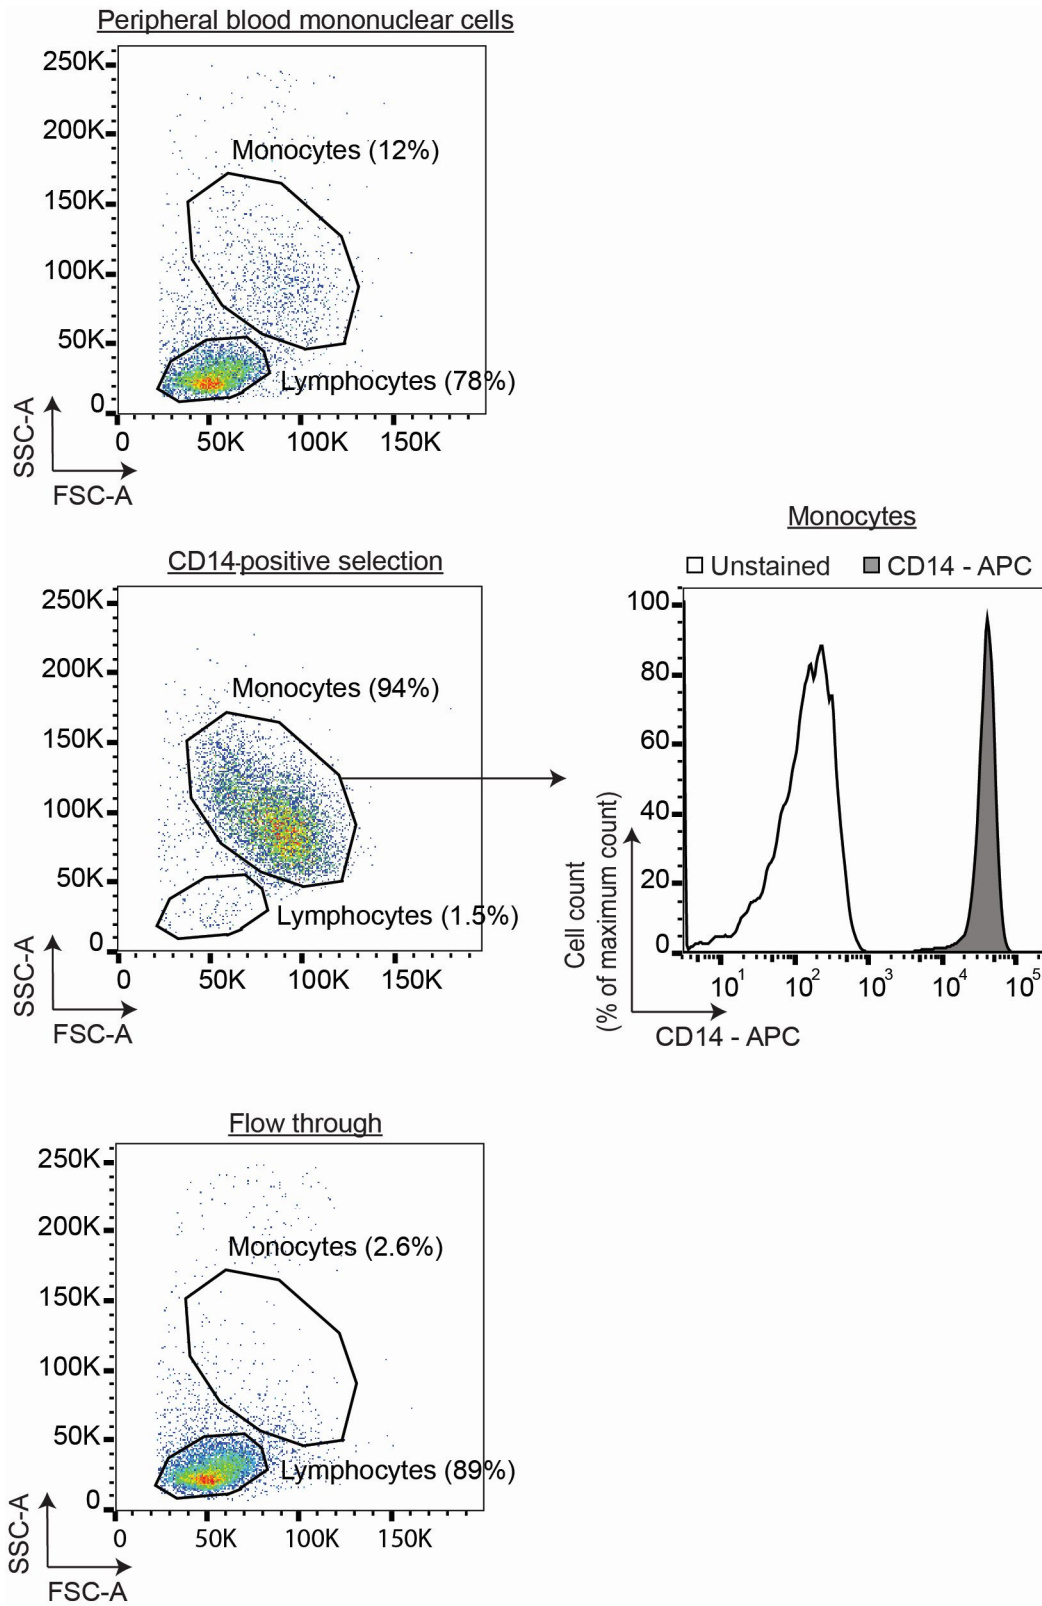

**Figure 1**

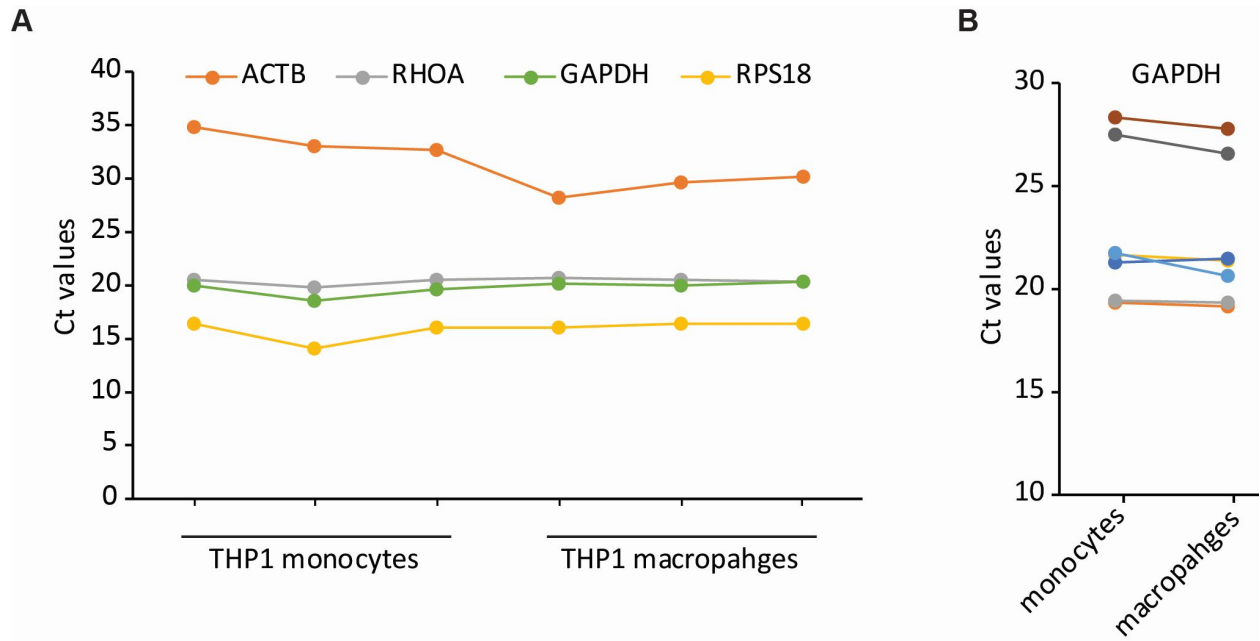

Figure 2

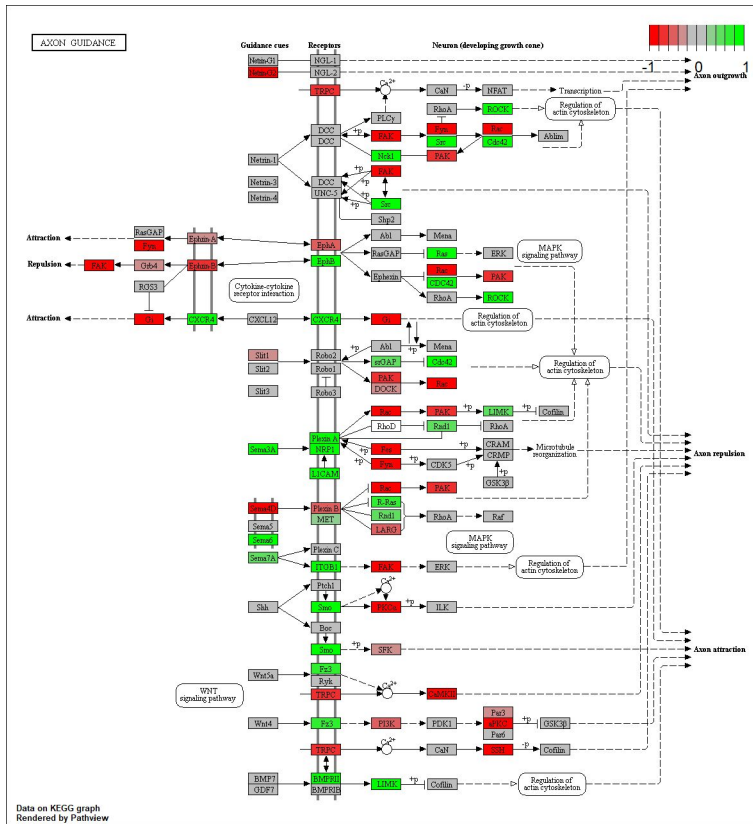

Figure 3

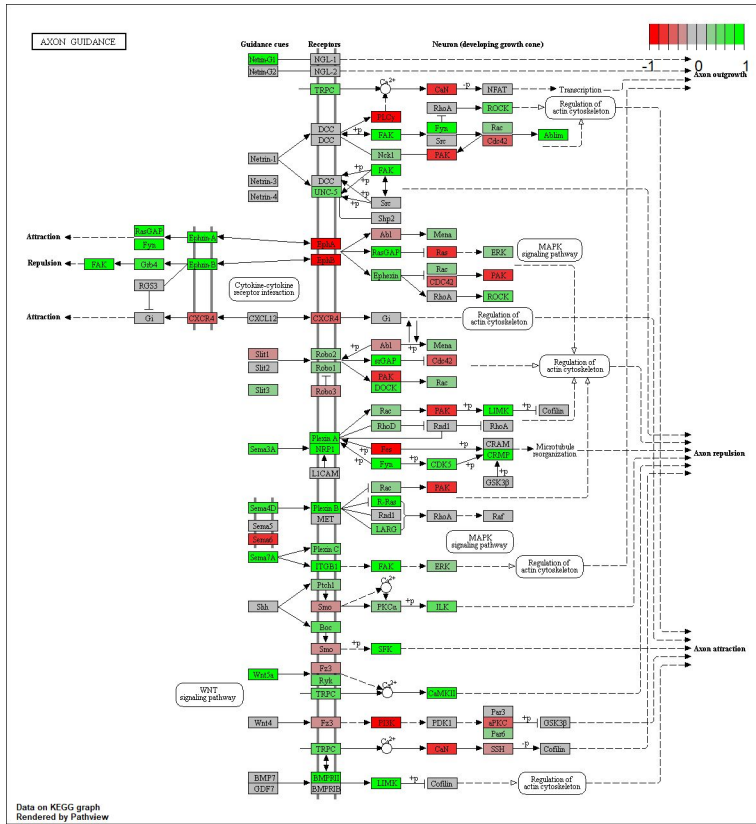

Figure 4

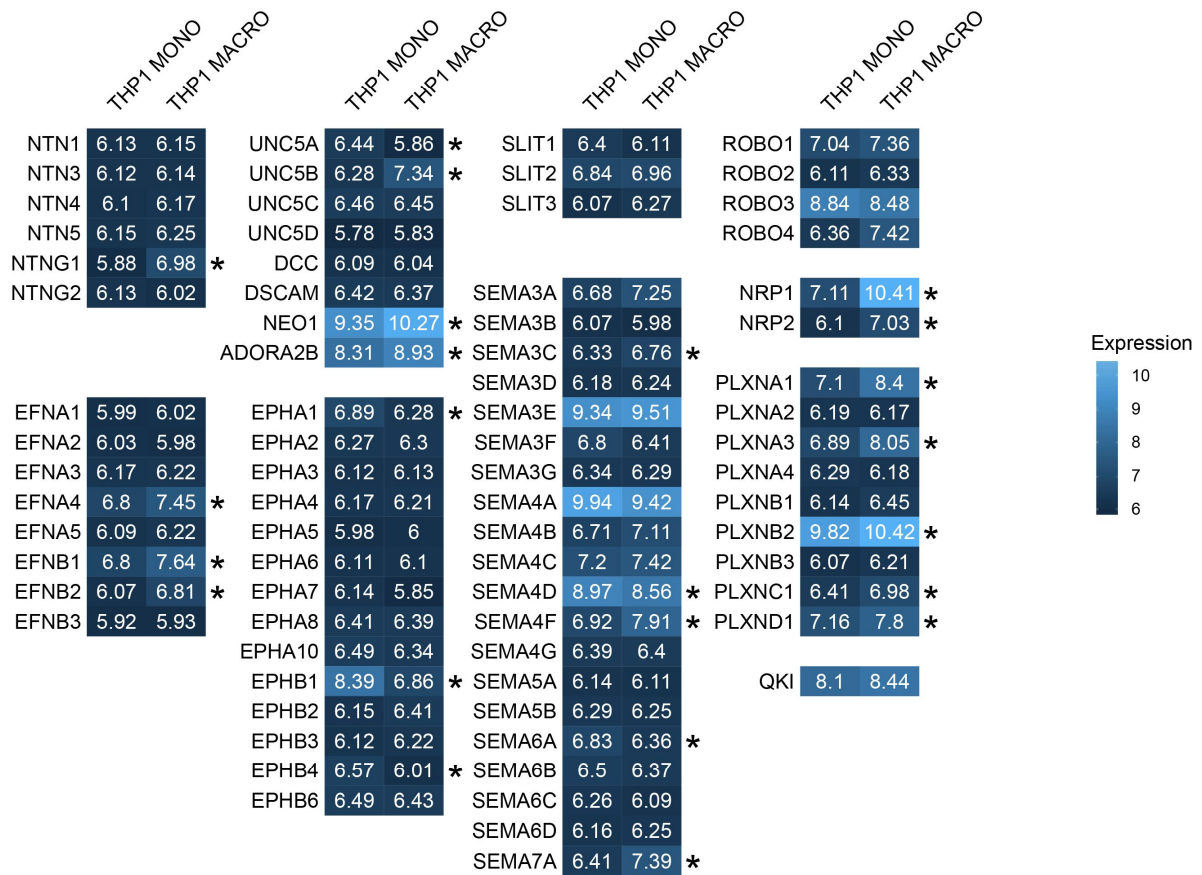

Figure 5

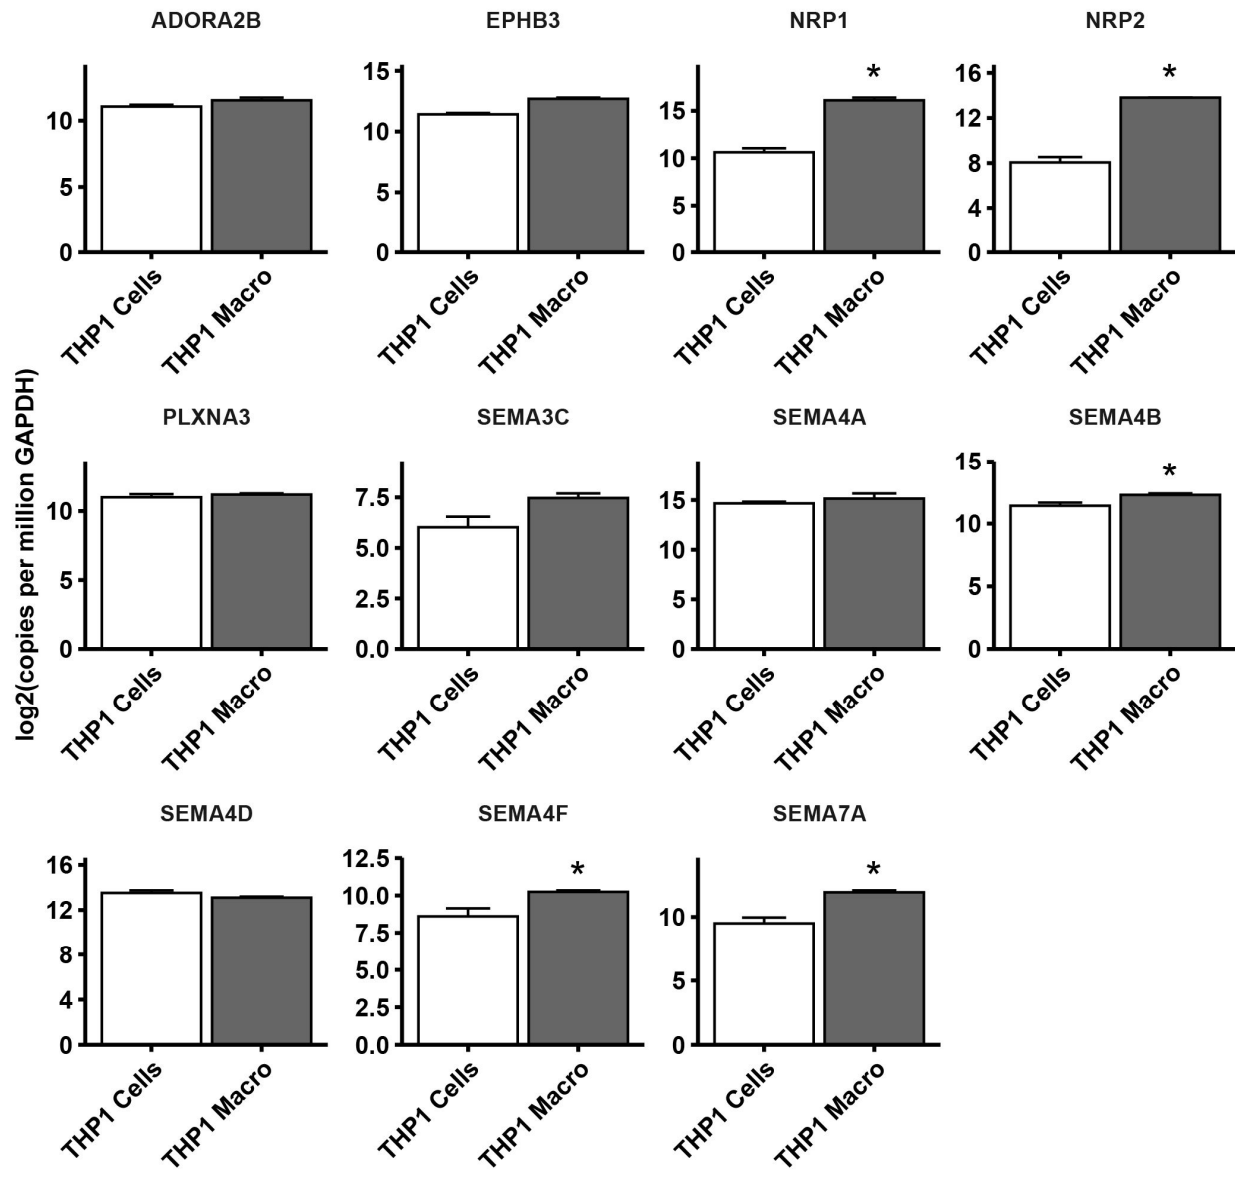

Figure 6
