# Supplementary material for: Comprehensive analysis of neuronal guidance cue expression regulation during monocyte-to-macrophage differentiation reveals post-transcriptional regulation of semaphorin7A by the RNA-binding protein quaking
Source: PubMed Central journal article supplement (PMC7882812; doi:10.1177/1753425920966645), 2020-11-26
Supplement: sj-pdf-2-ini-10.1177_1753425920966645.pdf [file sj-pdf-2-ini-10.1177_1753425920966645.pdf]

**Supplementary Table 1.** Summary of the data accessions used in relation to the experimental materials and the profiling methods.

| <b>No.</b> | <b>Material</b> | <b>Description</b>                                 | <b>Type</b> | <b>Accession</b> | <b>Differentiation Method</b> | <b>Profiling Method</b> |
|------------|-----------------|----------------------------------------------------|-------------|------------------|-------------------------------|-------------------------|
| 1          | Human monocyte  | Patients with atherosclerosis and healthy controls | online      | GSE9820          | 20 h Plastic Culture          | Microarray (mRNA)       |
| 2          | THP-1 cell line | THP-1 cells and THP-1 macrophage                   | in house    | GSE74887         | PMA (100 n) for 8 d           | Microarray (mRNA)       |
| 3          | Human monocyte  | QKI haploinsufficiency patient and her sibling     | in house    | GSE74978         | GM-CSF (5 ng/ml) for 7 d      | RNAseq (mRNA)           |
| 4          | Human monocyte  | Healthy controls                                   | online      | GSE52986         | NA                            | Microarray (miRNA)      |
| 5          | K562 cell line  | Isogenic duplicates of QKI eCLIP-seq in K562 cells | online      | ENCSR366YOG      | NA                            | eCLIP-seq               |
